# Supplementary material for: Direct targets of the TRP63 transcription factor revealed by a combination of gene expression profiling and reverse engineering
Source: HighWire-hosted journal article supplement (doi:10.1101/gr.073601.107), 2008-04-25
Supplement: DellaGatta_SupFig4.pdf [file DellaGatta_SupFig4.pdf]

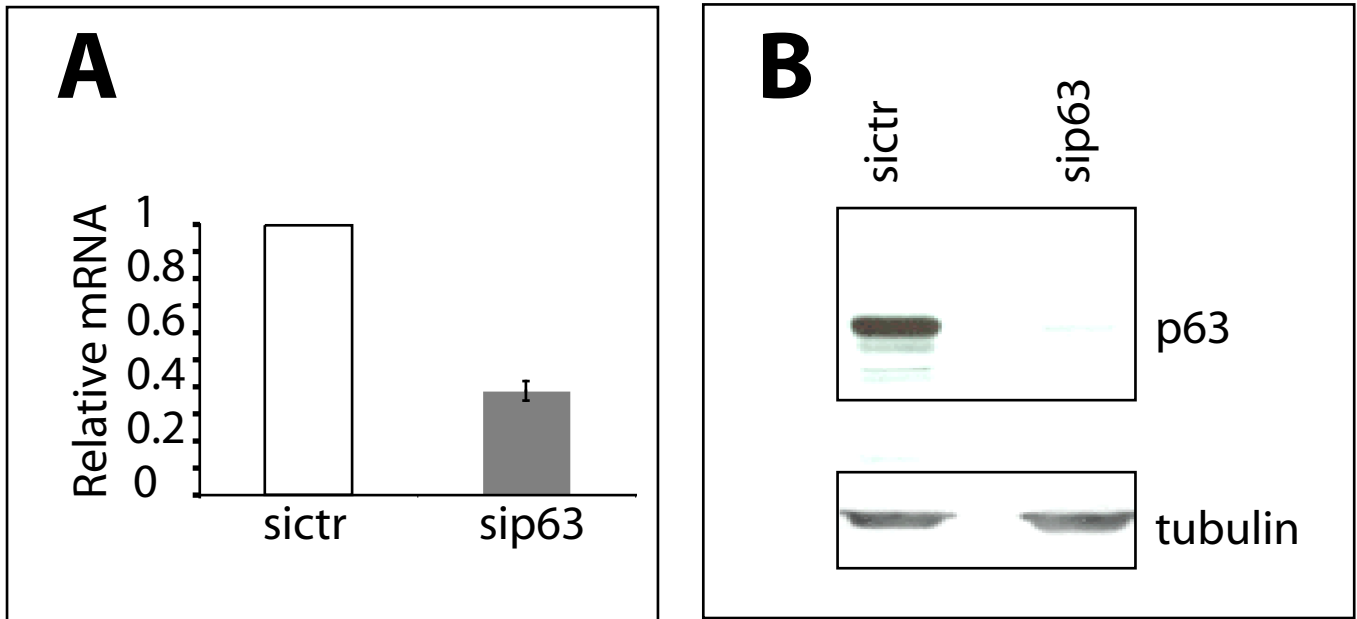

Supplementary Figure 4: Knockdown of p63 by siRNA (A) Primary mouse keratinocytes were transfected with a specific p63 siRNA oligonucleotide (sictr) and collected at 48h after treatment. p63 mRNA levels were quantified by real time RT-PCR using p63-specific oligonucleotide primers. Values are expressed as relative arbitrary units after internal normalization for GAPDH. Values represent a mean of three different experiments. (B) p63 protein levels were visualized by immunoblotting using mouse monoclonal anti-p63 antibodies (4A4, Santa Cruz Biotech.). Immunoblotting for tubulin was used for equal loading control. Given that in primary mouse keratinocytes the only detectable p63 isoform is the  $\Delta Np63\alpha$ , we used a pan-isoform p63 siRNA.
